# Supplementary material for: miR-342 overexpression results in a synthetic lethal phenotype in BRCA1-mutant HCC1937 breast cancer cells
Source: PubMed Central journal article supplement (PMC4951312; doi:10.18632/oncotarget.7617), 2016-02-23
Supplement: oncotarget-07-18594-s001.pdf [file oncotarget-07-18594-s001.pdf]

## SUPPLEMENTARY FIGURES AND TABLE

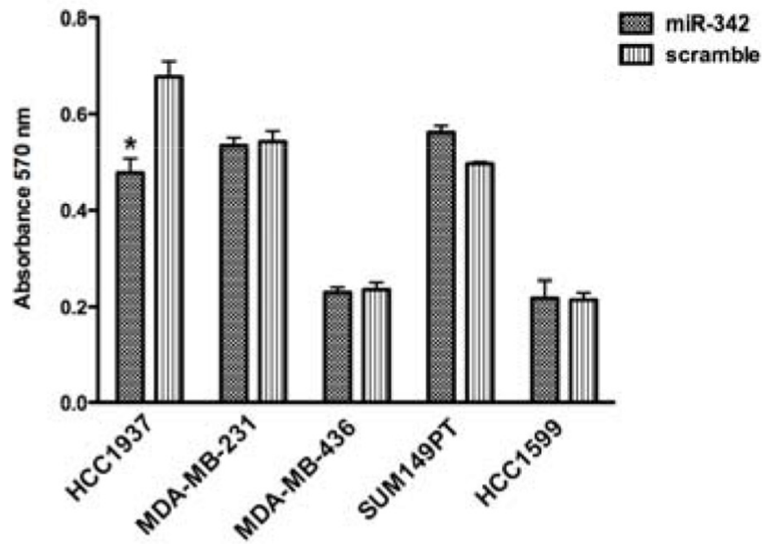

**Supplementary Figure S1: miR-342 reduces cell viability in HCC1937 cells.** MTT viability assay performed 72 hours after pre-miR-342 or pre-miR-negative control (scramble) transfection in the cell lines analyzed. Data represent mean  $\pm$  SD from at least three independent determinations. \*P<0.05 vs. scramble.

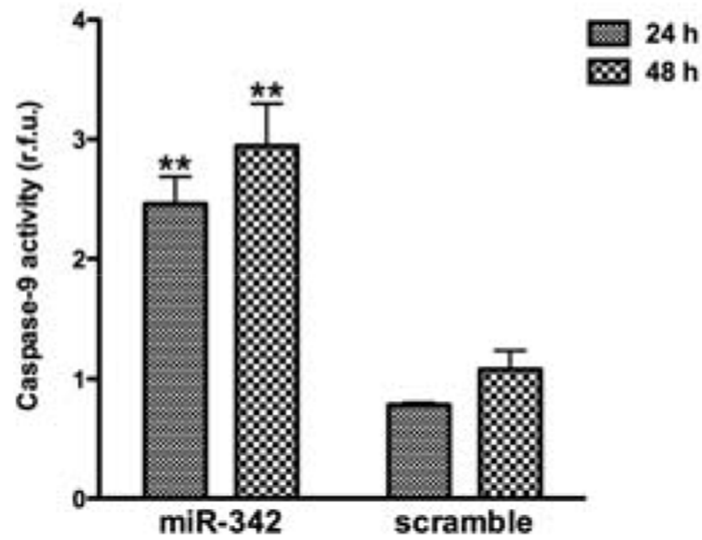

**Supplementary Figure S2: miR-342 overexpression increases caspase-9 activity in HCC1937 breast cancer cells.** Caspase-9 catalytic activity based on hydrolysis of a specific fluorogenic substrate. Data are given as relative fluorescence units (r.f.u.) and represent mean  $\pm$  SD from at least three independent determinations. \*\*P<0.01 vs. scramble.

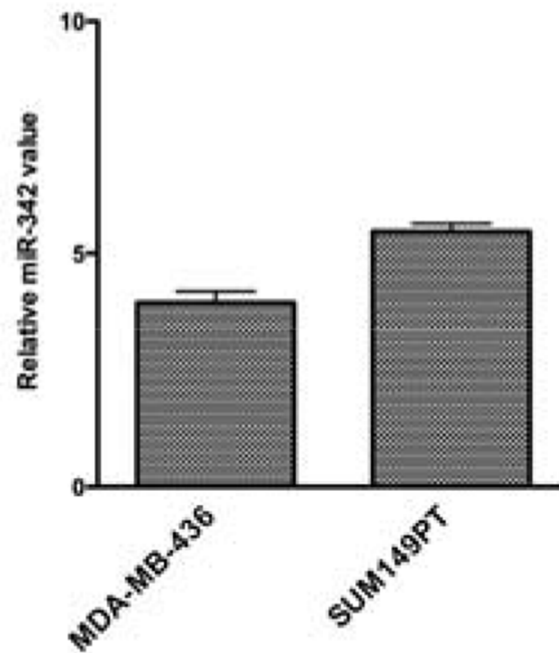

**Supplementary Figure S3: MDA-MB-436 and SUM149PT cells express higher endogenous miR-342 than do HCC1937 cells.** Relative quantification of miR-342 expression in MDA-MB-436 and SUM149PT cells as compared with that in HCC1937 cells. Data are expressed as  $2^{-\Delta\Delta C_t}$  and represent mean  $\pm$  SD from three independent determinations.

Supplementary Table S1: Sequences of siRNAs targeting *BRCA1* mRNA

| Name            | Sequence                                             |
|-----------------|------------------------------------------------------|
| <i>BRCA1</i> #1 | GAAGCCAGCUC AAGCAAUAdTdT<br>dTdTTCUUCGGUCGAGUUCGUUAU |
| <i>BRCA1</i> #2 | GACGUCUGUCUACAUUGAAAdTdT<br>dTdTTCUGCAGACAGAUGUAACUU |
| <i>BRCA1</i> #5 | UAACUCUCCUGAACAUAdTdT<br>dTdTTAUUGAGAGGACUUGUAGAU    |
| <i>BRCA1</i> #6 | AGACGUCUGUCUACAUUGAdTdT<br>dTdTUCUGCAGACAGAUGUAACU   |
